# Supplementary material for: High-Fat Diets Modify the Proteolytic Activities of Dipeptidyl-Peptidase IV and the Regulatory Enzymes of the Renin–Angiotensin System in Cardiovascular Tissues of Adult Wistar Rats
Source: MDPI journal article supplement (doi:10.3390/biomedicines9091149), 2021-09-03
Supplement: s1 [file s1]

**Supplementary Table S1.** Angiotensinase activities in atrium, ventricle, aorta and plasma.

| Sample    | Angiotensinase | Diet | Mean ± SEM (sol)<br>[pmol/min/mg<br>prot.] | P-value | Mean ± SEM (mb)<br>[pmol/min/mg prot.] | P-value |
|-----------|----------------|------|--------------------------------------------|---------|----------------------------------------|---------|
| Atrium    | AspAP          | S    | Nd                                         | -       | 59.99 ± 4.58                           | 0.315   |
|           |                | VOO  | Nd                                         |         | 53.13 ± 2.48                           |         |
|           |                | Bch  | Nd                                         |         | 65.15 ± 8.16                           |         |
|           | GluAP          | S    | 168.62 ± 17.71                             | 0.901   | 789.70 ± 72.70                         | 0.857   |
|           |                | VOO  | 153.51 ± 10.97                             |         | 857.58 ± 84.48                         |         |
|           |                | Bch  | 166.22 ± 39.27                             |         | 818.27 ± 105.56                        |         |
|           | AlaAP          | S    | 584.10 ± 90.52                             | 0.221   | 591.99 ± 72.12                         | 0.744   |
|           |                | VOO  | 465.51 ± 75.83                             |         | 521.35 ± 47.50                         |         |
|           |                | Bch  | 650.59 ± 75.67                             |         | 531.41 ± 86.84                         |         |
|           | ArgAP          | S    | 441.72 ± 80.25                             | 0.576   | 582.15 ± 75.58                         | 0.904   |
|           |                | VOO  | 404.10 ± 82.18                             |         | 533.44 ± 64.48                         |         |
|           |                | Bch  | 499.56 ± 90.35                             |         | 548.66 ± 96.41                         |         |
|           | CysAP          | S    | 212.18 ± 32.74                             | 0.042   | 201.40 ± 19.27                         | 0.827   |
|           |                | VOO  | 195.50 ± 23.11#                            | #0.047  | 186.84 ± 13.70                         |         |
|           |                | Bch  | 310.75 ± 21.51*                            | *0.033  | 206.23 ± 31.40                         |         |
| Ventricle | AspAP          | S    | 10.14 ± 0.55                               | 0.166   | 87.78 ± 3.76                           | 0.934   |
|           |                | VOO  | 10.76 ± 1.23                               |         | 86.61 ± 7.64                           |         |
|           |                | Bch  | 8.69 ± 0.40                                |         | 84.84 ± 5.68                           |         |
|           | GluAP          | S    | 49.29 ± 2.58                               | 0.203   | 1034.23 ± 94.61                        | 0.130   |
|           |                | VOO  | 49.85 ± 6.08                               |         | 1026.31 ± 53.57                        |         |
|           |                | Bch  | 39.87 ± 3.30                               |         | 1162.65 ± 35.85                        |         |
|           | AlaAP          | S    | 221.62 ± 18.81                             | 0.084   | 744.51 ± 71.48                         | 0.486   |
|           |                | VOO  | 248.98 ± 50.01                             |         | 739.20 ± 25.96                         |         |
|           |                | Bch  | 135.98 ± 27.46                             |         | 812.91 ± 53.63                         |         |
|           | ArgAP          | S    | 219.97 ± 25.71                             | 0.039   | 856.11 ± 74.59                         | 0.035   |
|           |                | VOO  | 255.20 ± 52.95                             | #0.025  | 763.06 ± 15.88#                        | #0.029  |
|           |                | Bch  | 127.80 ± 17.60#                            |         | 1013.07 ± 56.57                        |         |
|           | CysAP          | S    | 158.98 ± 8.20                              | 0.491   | 401.45 ± 11.09                         | 0.805   |
|           |                | VOO  | 195.70 ± 24.47                             |         | 395.22 ± 16.67                         |         |
|           |                | Bch  | 160.06 ± 14.96                             |         | 406.80 ± 5.80                          |         |
| Aorta     | AspAP          | S    | Nd                                         | -       | 429.61 ± 30.98                         | 0.253   |
|           |                | VOO  | Nd                                         |         | 325.91 ± 13.34                         |         |
|           |                | Bch  | Nd                                         |         | 417.64 ± 73.89                         |         |
|           | GluAP          | S    | 7311.12 ± 1829.06                          | 0.298   | 3538.40 ± 521.99                       | 0.045   |
|           |                | VOO  | 6168.07 ± 1150.65                          |         | 2024.36 ± 420.28#                      | #0.021  |
|           |                | Bch  | 9116.90 ± 1546.17                          |         | 3986.00 ± 582.40                       |         |
|           | AlaAP          | S    | 15,550.30 ± 2076.91                        | 0.221   | 3542.19 ± 194.96                       | 0.744   |
|           |                | VOO  | 13,923.76 ± 1763.02                        |         | 3039.49 ± 307.43                       |         |
|           |                | Bch  | 19,133.57 ± 3485.98                        |         | 3836.66 ± 315.52                       |         |
|           | ArgAP          | S    | 12,872.48 ± 1807.96                        | 0.337   | 1950.31 ± 125.24                       | 0.037   |
|           |                | VOO  | 11,769.74 ± 1740.13                        |         | 1548.75 ± 129.86#                      | #0.040  |
|           |                | Bch  | 15,948.30 ± 2238.67                        |         | 2087.72 ± 139.98                       |         |
|           | CysAP          | S    | 5576.68 ± 1040.81                          | 0.453   | 1215.32 ± 105.63                       | 0.578   |
|           |                | VOO  | 4701.84 ± 462.47                           |         | 1069.51 ± 76.23                        |         |
|           |                | Bch  | 6266.42 ± 904.14                           |         | 1148.11 ± 118.39                       |         |
| Sample    | Angiotensinase | Diet | Mean ± SEM<br>[pmol/min/mL]                | P-value |                                        |         |
| Plasma    | AspAP          | S    | 121.85 ± 12.22                             | 0.649   |                                        |         |
|           |                | VOO  | 113.24 ± 11.97                             |         |                                        |         |
|           |                | Bch  | 127.44 ± 7.05                              |         |                                        |         |
|           | GluAP          | S    | 153.91 ± 22.07                             | 0.221   |                                        |         |

|       |     |                 |       |
|-------|-----|-----------------|-------|
|       | VOO | 113.24 ± 4.20   |       |
|       | Bch | 150.67 ± 13.55  |       |
| AlaAP | S   | 456.14 ± 85.43  | 0.756 |
|       | VOO | 650.62 ± 228.71 |       |
|       | Bch | 506.14 ± 71.46  |       |
| ArgAP | S   | 332.63 ± 29.77  | 0.379 |
|       | VOO | 284.66 ± 17.06  |       |
|       | Bch | 380.04 ± 30.76  |       |
| CysAP | S   | 288.80 ± 10.22  |       |
|       | VOO | 311.56 ± 38.63  | 0.932 |
|       | Bch | 292.31 ± 10.39  |       |

Note: The values represent means and standard error of the mean (SEM) of angiotensinases activities in plasma [pmol/min/mL] and soluble (sol) and membrane-bound (mb) fractions of atrium, ventricle and aorta [pmol/min/mg prot.]. AlaAP: alanyl aminopeptidase; ArgAP: arginyl aminopeptidase; AspAP: aspartyl aminopeptidase; CysAP: cystinyl aminopeptidase; GluAP: glutamyl aminopeptidase. Nd: Not detected. P-value less than 0.05 was considered significant. \*  $p < 0.05$ , indicates significant differences between virgin olive oil diet (VOO) or butter plus cholesterol diet (Bch) vs. standard diet (S). #  $p < 0.05$ , indicates significant differences between VOO and Bch.

**Supplementary Table S2.** Dipeptidyl dipeptidase IV activity in atrium, ventricle, aorta and plasma.

| Sample    | Diet | Mean $\pm$ SEM (sol)            | P-value | Mean $\pm$ SEM (mb)   | P-value |
|-----------|------|---------------------------------|---------|-----------------------|---------|
|           |      | [pmol/min/mg prot.]             |         | [pmol/min/mg prot.]   |         |
| Atrium    | S    | 223.28 $\pm$ 35.25              | 0.808   | 1476.76 $\pm$ 102.34  | 0.035   |
|           | VOO  | 225.48 $\pm$ 41.31              |         | 1743.86 $\pm$ 99.46   | #0.049  |
|           | Bch  | 254.23 $\pm$ 12.48              |         | 1222.50 $\pm$ 223.93# |         |
| Ventricle | S    | 67.28 $\pm$ 5.65                | 0.095   | 3764.83 $\pm$ 163.21  | 0.200   |
|           | VOO  | 81.27 $\pm$ 14.14               |         | 4012.39 $\pm$ 205.71  |         |
|           | Bch  | 48.92 $\pm$ 7.32                |         | 3550.59 $\pm$ 113.16  |         |
| Aorta     | S    | 7490.30 $\pm$ 1347.70           | 0.150   | 3937.62 $\pm$ 478.42  | 0.033   |
|           | VOO  | 10,908.35 $\pm$ 991.10          |         | 3175.38 $\pm$ 102.01  | *0.028  |
|           | Bch  | 10,596.26 $\pm$ 1542.62         |         | 2321.89 $\pm$ 224.54* |         |
| Sample    | Diet | Mean $\pm$ SEM<br>[pmol/min/mL] | P-value |                       |         |
| Plasma    | S    | 1605.29 $\pm$ 213.23            | 0.157   |                       |         |
|           | VOO  | 2536.39 $\pm$ 355.64            |         |                       |         |
|           | Bch  | 2051.97 $\pm$ 357.88            |         |                       |         |

Note: The values represent means and standard error of the mean (SEM) of dipeptidyl dipeptidase IV (DPP-IV) activity in plasma [pmol/min/mL] and soluble (sol) and membrane-bound (mb) fractions of atrium, ventricle and aorta [pmol/min/mg prot.]. P-value less than 0.05 was considered significant. \*  $p < 0.05$ , indicates significant differences between virgin olive oil diet (VOO) or butter plus cholesterol diet (Bch) vs. standard diet (S). #  $p < 0.05$ , indicates significant differences between VOO and Bch.

**Supplementary Table S3.** Leucyl aminopeptidase, gamma-glutamyl transferase and pyroglutamyl aminopeptidase activities in atrium, ventricle, aorta and plasma.

| Sample    | Angiotensinase | Diet | Mean ± SEM (sol)<br>[pmol/min/mg prot.] | P-value | Mean ± SEM (mb)<br>[pmol/min/mg prot.] | P-value |
|-----------|----------------|------|-----------------------------------------|---------|----------------------------------------|---------|
| Atrium    | Leu            | S    | Nd                                      | -       | Nd                                     | -       |
|           |                | VOO  | Nd                                      |         | Nd                                     |         |
|           |                | Bch  | Nd                                      |         | Nd                                     |         |
|           | GGT            | S    | Nd                                      | -       | Nd                                     | -       |
|           |                | VOO  | Nd                                      |         | Nd                                     |         |
|           |                | Bch  | Nd                                      |         | Nd                                     |         |
|           | pGluAP         | S    | Nd                                      | -       | 75.99 ± 1.82                           | 0.008   |
|           |                | VOO  | Nd                                      |         | 58.22 ± 4.92*                          | *0.011  |
|           |                | Bch  | Nd                                      |         | 54.83 ± 6.00*                          | *0.030  |
| Ventricle | Leu            | S    | 291.37 ± 33.40                          | 0.039   | 636.06 ± 70.51                         | 0.004   |
|           |                | VOO  | 326.41 ± 69.34                          | *0.027  | 667.32 ± 23.08#                        | *0.005  |
|           |                | Bch  | 162.87 ± 21.53*                         |         | 924.99 ± 39.31*                        | #0.013  |
|           | GGT            | S    | 31.68 ± 2.58                            | 0.233   | 244.02 ± 29.30                         | 0.903   |
|           |                | VOO  | 32.36 ± 4.00                            |         | 245.92 ± 22.14                         |         |
|           |                | Bch  | 23.57 ± 2.15                            |         | 230.11 ± 24.83                         |         |
|           | pGluAP         | S    | 10.27 ± 0.72                            | 0.431   | 74.66 ± 1.52                           | 0.173   |
|           |                | VOO  | 11.63 ± 1.37                            |         | 80.41 ± 6.37                           |         |
|           |                | Bch  | 9.58 ± 1.11                             |         | 77.16 ± 1.99                           |         |
| Aorta     | Leu            | S    | 9667.46 ± 1561.22                       | 0.198   | 2071.56 ± 100.69                       | 0.006   |
|           |                | VOO  | 11,769.61 ± 1438.06                     |         | 1753.36 ± 213.53#                      | #0.017  |
|           |                | Bch  | 14,058.63 ± 1713.46                     |         | 2681.70 ± 111.30*                      | *0.025  |
|           | GGT            | S    | 4543.64 ± 746.47                        | 0.375   | 5473.36 ± 1047.74                      | 0.972   |
|           |                | VOO  | 5739.25 ± 850.70                        |         | 5266.88 ± 617.60                       |         |
|           |                | Bch  | 5031.80 ± 154.47                        |         | 5555.47 ± 904.69                       |         |
|           | pGluAP         | S    | 4717.07 ± 972.06                        | 0.532   | 1145.60 ± 108.80                       | 0.472   |
|           |                | VOO  | 3703.08 ± 411.05                        |         | 977.09 ± 76.90                         |         |
|           |                | Bch  | 4487.61 ± 735.24                        |         | 1000.01 ± 130.44                       |         |
| Sample    | Angiotensinase | Diet | Mean ± SEM<br>[pmol/min/mL]             | P-value |                                        |         |
| Plasma    | Leu            | S    | 236.58 ± 3.31                           | 0.251   |                                        |         |
|           |                | VOO  | 246.10 ± 2.85                           |         |                                        |         |
|           |                | Bch  | 236.48 ± 3.75                           |         |                                        |         |
|           | GGT            | S    | 122.02 ± 15.07                          | 0.529   |                                        |         |
|           |                | VOO  | 101.47 ± 12.90                          |         |                                        |         |
|           |                | Bch  | 111.75 ± 8.85                           |         |                                        |         |
|           | pGluAP         | S    | 108.22 ± 7.09                           | 0.279   |                                        |         |
|           |                | VOO  | 99.37 ± 7.50                            |         |                                        |         |
|           |                | Bch  | 124.51 ± 15.37                          |         |                                        |         |

Note: The values represent means and standard error of the mean (SEM) of Leucyl aminopeptidase, gamma-glutamyl transferase and pyroglutamyl aminopeptidase activities in plasma [pmol/min/mL] and soluble (sol) and membrane-bound (mb) fractions of atrium, ventricle and aorta [pmol/min/mg prot.]. LeuAP: Leucyl aminopeptidase; GGT: gamma-glutamyl transferase; pGluAP: pyroglutamyl aminopeptidase activities. Nd: Not detected. P-value less than 0.05 was considered significant. \* p < 0.05, indicates significant differences between virgin olive oil diet (VOO) or butter plus cholesterol diet (Bch) vs. standard diet (S). # p < 0.05, indicates significant differences between VOO and Bch.

**Supplementary Figure S1.** Group and intra-group correlations between significant glutamyl aminopeptidase, alanyl aminopeptidase, arginyl aminopeptidase, and cystinyl aminopeptidase activities analyzed in plasma and soluble and membrane-bound fractions of atrium, ventricle and aorta.

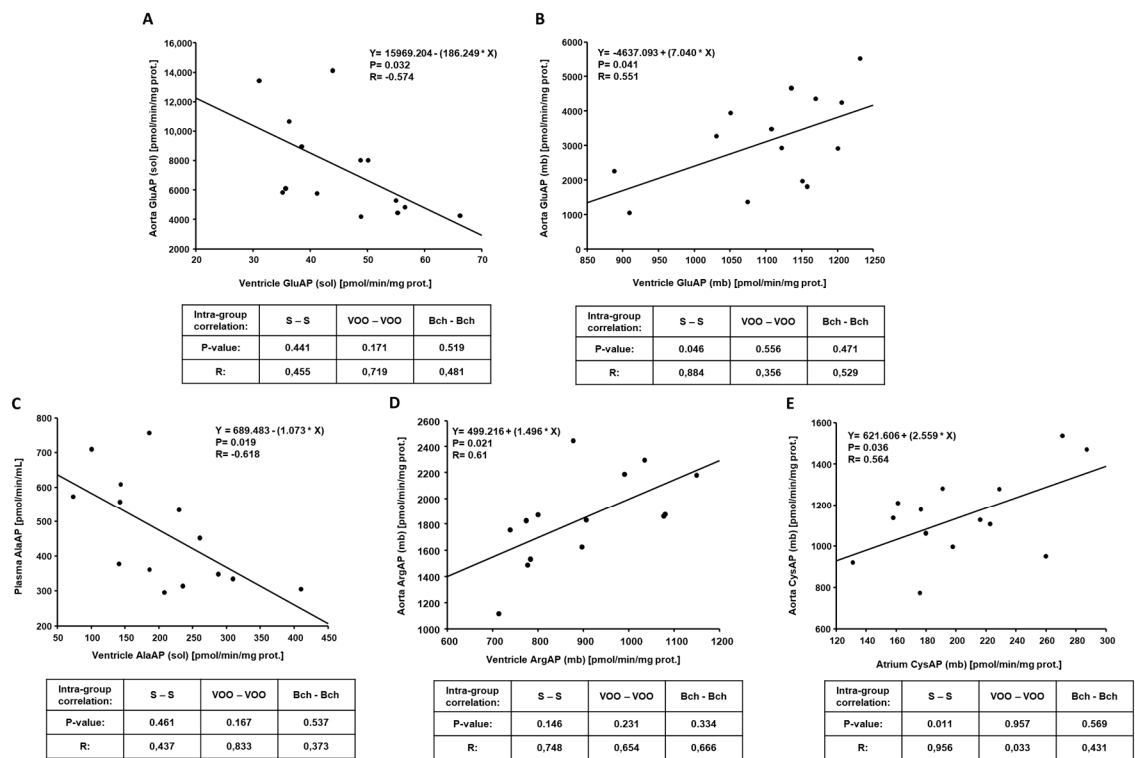

**Supplementary Figure S1.** Group and intra-group correlations between significant (A-B) glutamyl aminopeptidase (GluAP), (C) alanyl aminopeptidase (AlaAP), (D) arginyl aminopeptidase (ArgAP), (E) cystinyl aminopeptidase (CysAP) activities analyzed in plasma [pmol/min/mL] and soluble (sol) and membrane-bound (mb) fractions of atrium, ventricle and aorta [pmol/min/mg prot.]. P-value less than 0.05 was considered significant. R: linear correlation coefficient. The table below the figure represents the correlations between the same tissues with the same dietary groups (intra-group correlation).

**Supplementary Figure S2.** Group and intra-group correlations between significant dipeptidyl peptidase IV activity analyzed in plasma and soluble fractions of atrium.

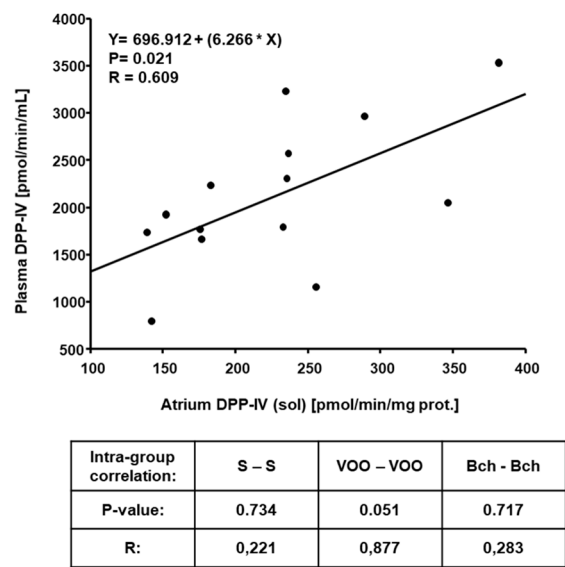

**Supplementary Figure S2.** Group and intra-group correlations between significant dipeptidyl peptidase IV (DPP-IV) activity analyzed in plasma [pmol/min/mL] and soluble (sol) fractions of atrium [pmol/min/mg prot.]. P-value less than 0.05 was considered significant. R: linear correlation coefficient. The table below the figure represents the correlations between the same tissues with the same dietary groups (intra-group correlation).

**Supplementary Figure S3.** Group and intra-group correlations between significant leucyl aminopeptidase activity analyzed in membrane-bound fractions of ventricle and aorta.

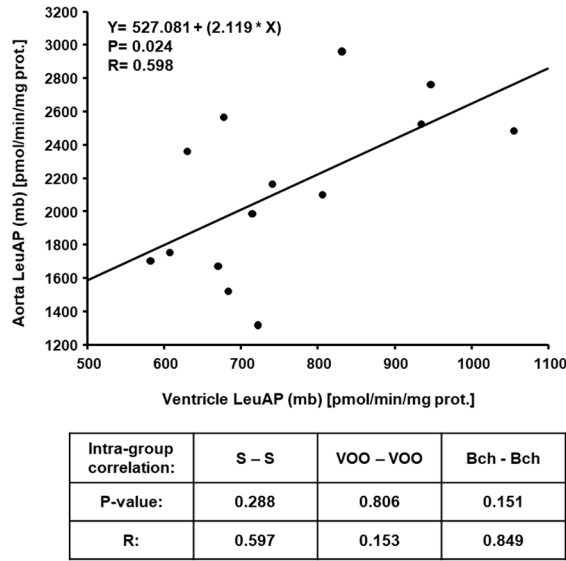

**Supplementary Figure S3.** Group and intra-group correlations between significant (leucyl aminopeptidase (LeuAP) activity analyzed in membrane-bound (mb) fractions of ventricle and aorta [pmol/min/mg prot.]. P-value less than 0.05 was considered significant. R: linear correlation coefficient. The table below the figure represents the correlations between the same tissues with the same dietary groups (intra-group correlation).
